# Supplementary material
Source: HighWire-hosted journal article supplement (https://bmjopen.bmj.com/content/9/3/e027411)
Supplement: inline-supplementary-material-1 [file inline-supplementary-material-1.pdf]

## **Supplementary information**

Trends in hepatitis C treatment initiation among HIV/hepatitis C virus-coinfected men engaged in primary care in a multisite community health center in Maryland:  
a retrospective cohort study

Yun-Chi Chen, et al.

## Supplementary Table

**Table S1. Characteristics of the HCV/HIV-coinfected men based on the educational attainment**

| Educational attainment       | High school or less<br>(N = 277) |      | More than high school<br>(N = 83) |      |                  |
|------------------------------|----------------------------------|------|-----------------------------------|------|------------------|
| Characteristics              | No.                              | (%)  | No.                               | (%)  | <i>P</i> value   |
| Age                          |                                  |      |                                   |      | <b>.038</b>      |
| <40                          | 41                               | (15) | 22                                | (27) |                  |
| 40 – 49                      | 136                              | (49) | 32                                | (39) |                  |
| ≥50                          | 100                              | (36) | 29                                | (35) |                  |
| Race                         |                                  |      |                                   |      | <b>.002</b>      |
| Black                        | 245                              | (88) | 60                                | (72) |                  |
| White                        | 29                               | (11) | 21                                | (25) |                  |
| Others                       | 3                                | (1)  | 2                                 | (2)  |                  |
| Clinic sites                 |                                  |      |                                   |      | .81              |
| Baltimore                    | 244                              | (88) | 74                                | (89) |                  |
| Eastern Shore                | 33                               | (12) | 9                                 | (11) |                  |
| Time of entering care        |                                  |      |                                   |      | .44              |
| Before 2008                  | 130                              | (47) | 43                                | (52) |                  |
| 2008–2013                    | 147                              | (53) | 40                                | (48) |                  |
| Employment                   |                                  |      |                                   |      | <b>&lt; .001</b> |
| Unemployed                   | 217                              | (78) | 39                                | (47) |                  |
| Employed                     | 60                               | (22) | 44                                | (53) |                  |
| Type of insurance            |                                  |      |                                   |      | <b>&lt; .001</b> |
| Private                      | 30                               | (11) | 27                                | (33) |                  |
| Medicare                     | 97                               | (35) | 23                                | (28) |                  |
| Medicaid                     | 122                              | (44) | 21                                | (25) |                  |
| Other                        | 28                               | (10) | 12                                | (14) |                  |
| Ever illicit drug use        |                                  |      |                                   |      | <b>.005</b>      |
| Yes                          | 260                              | (94) | 69                                | (83) |                  |
| No                           | 17                               | (6)  | 14                                | (17) |                  |
| Ever IDU                     |                                  |      |                                   |      | <b>&lt; .001</b> |
| Yes                          | 215                              | (78) | 44                                | (53) |                  |
| No                           | 62                               | (22) | 39                                | (47) |                  |
| Sexual behavior              |                                  |      |                                   |      | <b>&lt; .001</b> |
| Non-MSM                      | 220                              | (79) | 32                                | (39) |                  |
| MSM                          | 57                               | (21) | 51                                | (61) |                  |
| HIV RNA at initial visit     |                                  |      |                                   |      | .75              |
| ≥400 copies/ml               | 168                              | (61) | 52                                | (63) |                  |
| <400 copies/ml               | 109                              | (39) | 31                                | (37) |                  |
| Baseline CD4 count           |                                  |      |                                   |      | <b>.025</b>      |
| <200 cell/mm <sup>3</sup>    | 82                               | (30) | 19                                | (23) |                  |
| 200–499 cell/mm <sup>3</sup> | 127                              | (46) | 31                                | (37) |                  |
| ≥500 cell/mm <sup>3</sup>    | 68                               | (25) | 33                                | (40) |                  |
| Nadir CD4 count              |                                  |      |                                   |      | .85              |
| <200 cell/mm <sup>3</sup>    | 160                              | (58) | 47                                | (57) |                  |
| ≥200 cell/mm <sup>3</sup>    | 117                              | (42) | 36                                | (43) |                  |

Abbreviation: HCV, hepatitis C virus; IDU, injection drug use; MSM, men who have sex with men.

Boldface type indicates  $P < 0.05$ .

## Supplementary Table

**Table S2. Characteristics of the HCV/HIV-coinfected men entering care before 2008 or between 2008-2013**

| Characteristics                    | <2008 enrollees  | 2008–2013 enrollees | <i>P</i> value  |
|------------------------------------|------------------|---------------------|-----------------|
| Age (median, inter-quartile range) | N = 182          | N = 189             |                 |
| Age at clinic entry                | 45.9 (41.7–50.5) | 49.4 (44.7–53.6)    | <b>&lt;.001</b> |
| Age as of 1/1/2008                 | 49.2 (44.8–53.2) | 46.4 (42.1–50.7)    | <b>&lt;.001</b> |
| Peak fibrosis stage (N, %)         | N = 132          | N = 143             | .96             |
| F0                                 | 13 (10%)         | 17 (12%)            |                 |
| F1                                 | 15 (11%)         | 16 (11%)            |                 |
| F2                                 | 41 (31%)         | 46 (32%)            |                 |
| F3                                 | 22 (17%)         | 20 (14%)            |                 |
| F4                                 | 41 (31%)         | 44 (31%)            |                 |
| HIV RNA at initial visit (N, %)    | N = 182          | N = 189             | <b>.002</b>     |
| <400 copies/ml                     | 56 (31%)         | 88 (47%)            |                 |
| ≥400 copies/ml                     | 126 (69%)        | 101 (53%)           |                 |
| HCV genotype (N, %)                | N = 172          | N = 183             | .34             |
| Genotype 1                         | 164 (95%)        | 170 (93%)           |                 |
| Other genotype                     | 8 (5%)           | 13 (7%)             |                 |
| Type of insurance (N, %)           | N = 182          | N = 189             | .12             |
| Private                            | 34 (19%)         | 24 (13%)            |                 |
| Public or other                    | 148 (81%)        | 165 (87%)           |                 |
| Educational attainment (N, %)      | N = 173          | N = 187             | .44             |
| >12 years                          | 43 (25%)         | 40 (21%)            |                 |
| ≤12 years                          | 130 (75%)        | 147 (79%)           |                 |
| Being employed (N, %)              | N = 182          | N = 189             |                 |
| Yes                                | 62 (34%)         | 46 (24%)            | <b>.040</b>     |
| No                                 | 120 (66%)        | 143 (76%)           |                 |
